# Supplementary material
Source: PubMed Central journal article supplement (PMC8111569)
Supplement: NIHMS1690465-supplement-1.pdf [file NIHMS1690465-supplement-1.pdf]

Supplementary Table 1 Longitudinal changes in the SARA and INAS scores

| Type of SCA | The annual increase of the SARA score                                                                                                | The annual increase of the INAS score | Location                                                 |
|-------------|--------------------------------------------------------------------------------------------------------------------------------------|---------------------------------------|----------------------------------------------------------|
| SCA1        | 1.61 ± 0.41 [9]<br>2.18 ± 0.17 [10]                                                                                                  | 0.56 ± 0.11 [10]                      | United States [9], Europe [10]                           |
| SCA2        | 0.71 ± 0.31 [9]<br>1.40 ± 0.11 [10]<br>2.88 ± 2.32 [17]                                                                              | 0.30 ± 0.08 [10]                      | United States [9], Europe [10], Taiwan [17]              |
| SCA3        | 0.65 ± 0.24 [9]<br>1.61 ± 0.12 [10]<br>0.71 [15]<br>3.00 ± 1.52 [17]                                                                 | 0.30 ± 0.08 [10]                      | United States [9], Europe [10], Brazil [15], Taiwan [17] |
| SCA6        | 0.87 ± 0.28 [9]<br>0.35 ± 0.34 in the first year [10]<br>1.44 ± 0.34 in the second year [10]<br>1.33 ± 1.40 [12]<br>2.04 ± 0.76 [17] | 0.10 ± 0.08 [10]                      | United States [9], Europe [10], Japan [12], Taiwan [17]  |
| SCA17       | 4.50 ± 2.22 [17]                                                                                                                     |                                       | Taiwan [17]                                              |

INAS: The Inventory of Non-Ataxia Symptoms; SARA: Scale for the assessment and rating of ataxia

Values are given as mean ± SE.
